# Supplementary material for: Venous thromboembolism has the same risk factors as atherosclerosis: A PRISMA-compliant systemic review and meta-analysis
Source: PubMed Central journal article supplement — Medicine (Baltimore). 2016 Aug 12;95(32):e4495. doi: 10.1097/MD.0000000000004495 (PMC4985321; doi:10.1097/md.0000000000004495), 2016-08-12
Supplement: medi-95-e4495-s001.pdf [file medi-95-e4495-s001.pdf]

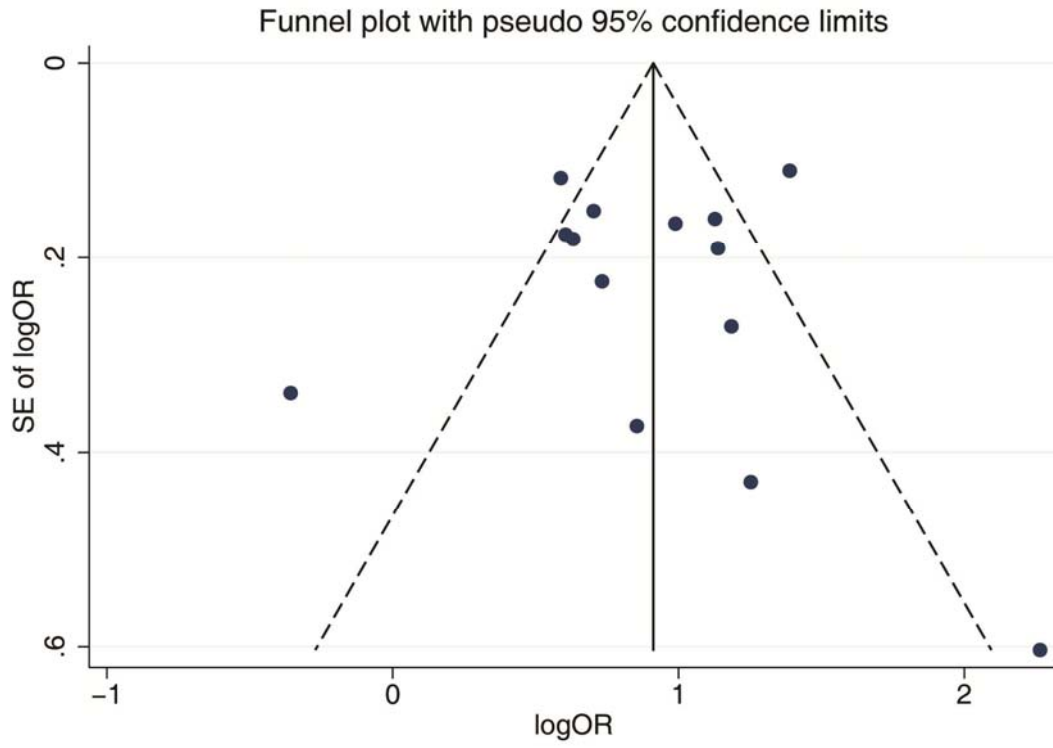

Figure S1 the funnel plots for the associations between VTE and BMI

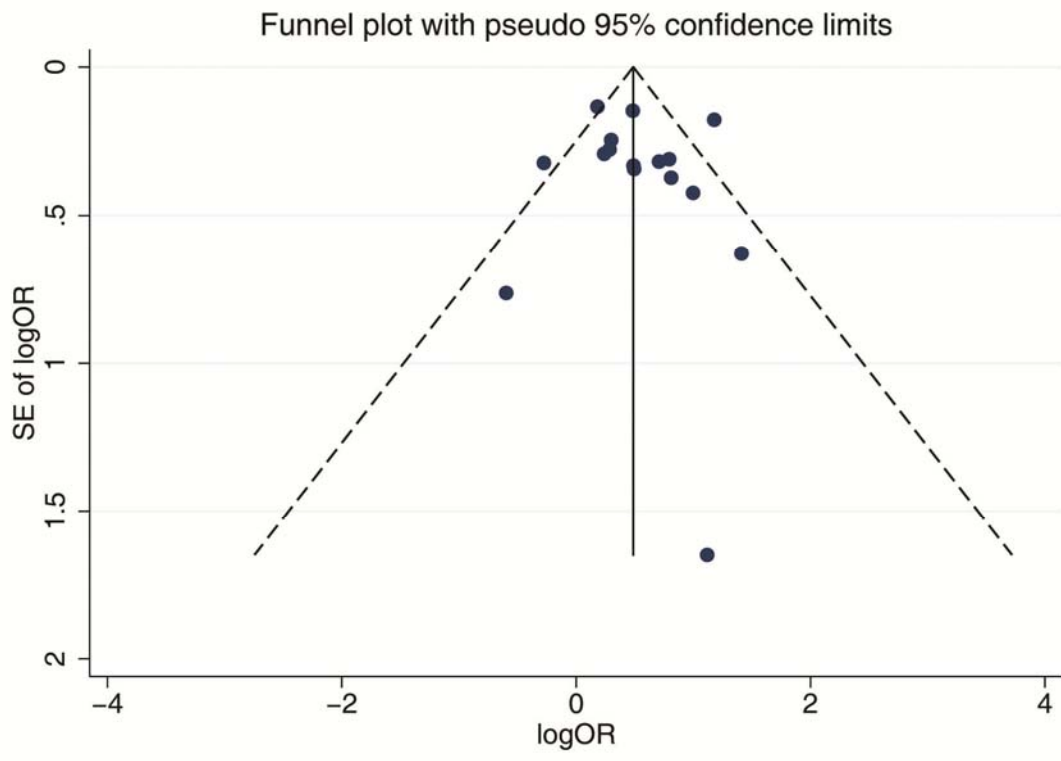

Figure S2 the funnel plots for the associations between VTE and diabetes

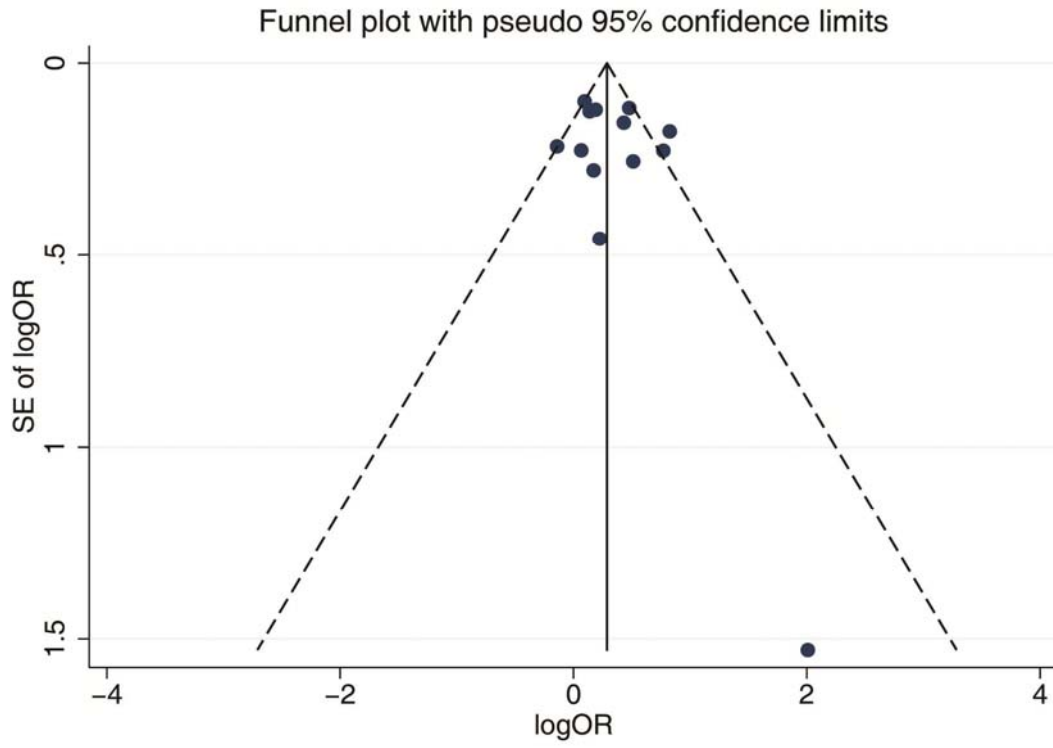

Figure S3 the funnel plots for the associations between VTE and hypertension

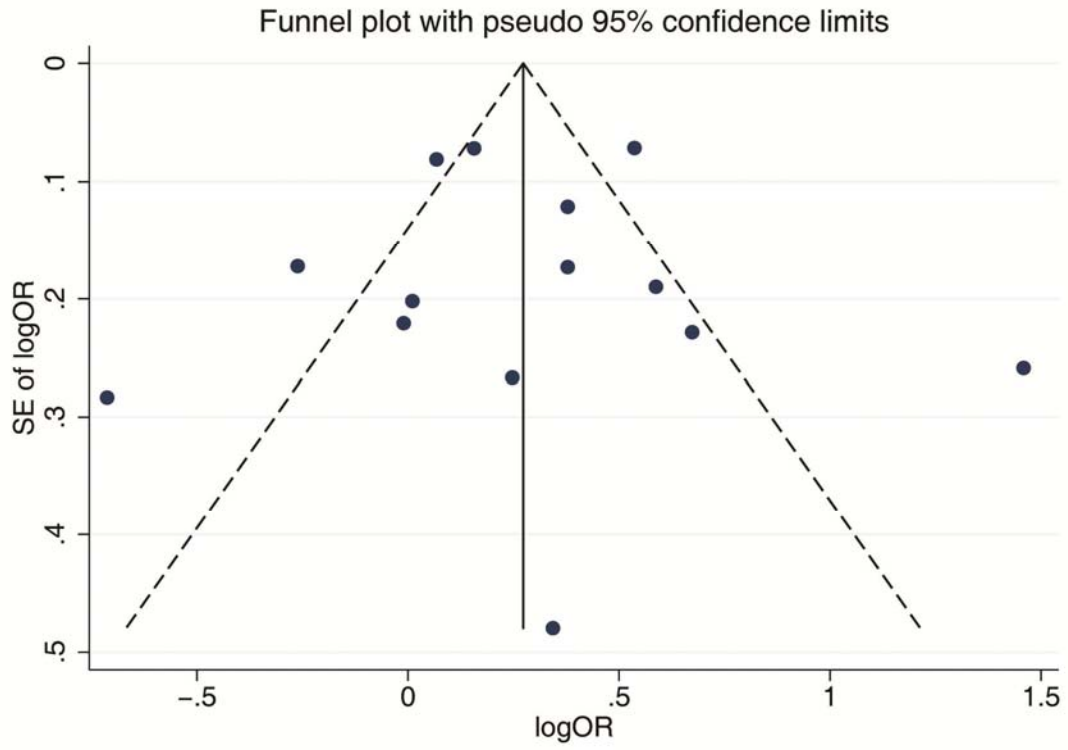

Figure S4 the funnel plots for the associations between VTE and smoking

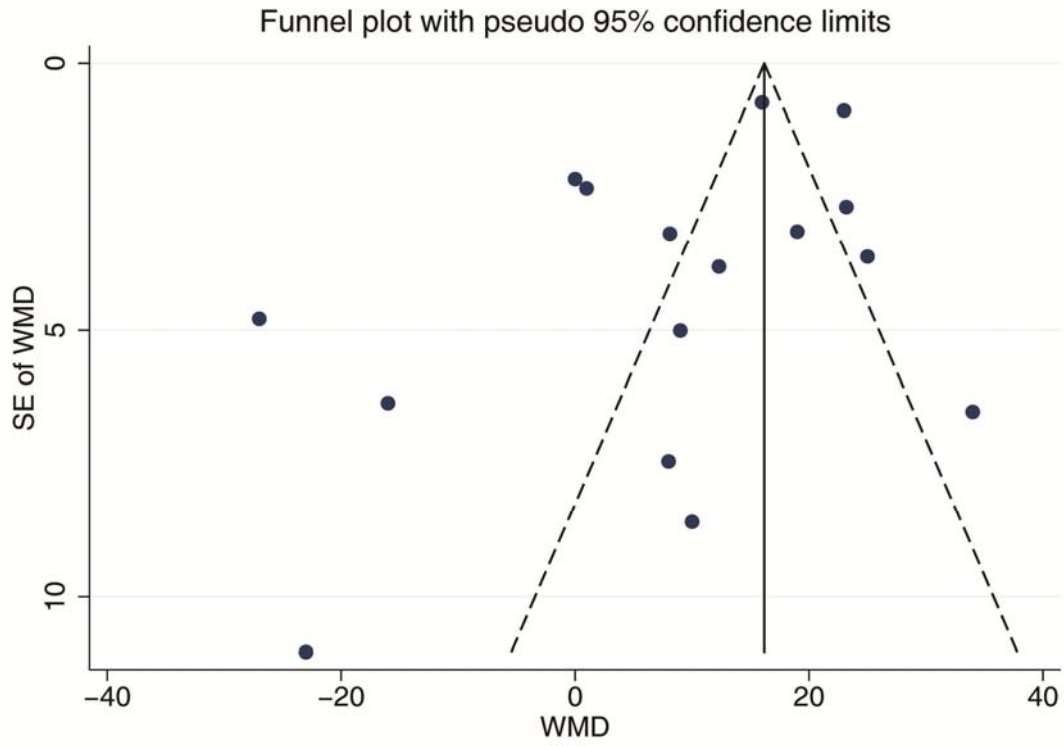

Figure S5 the funnel plots for the associations between VTE and TC

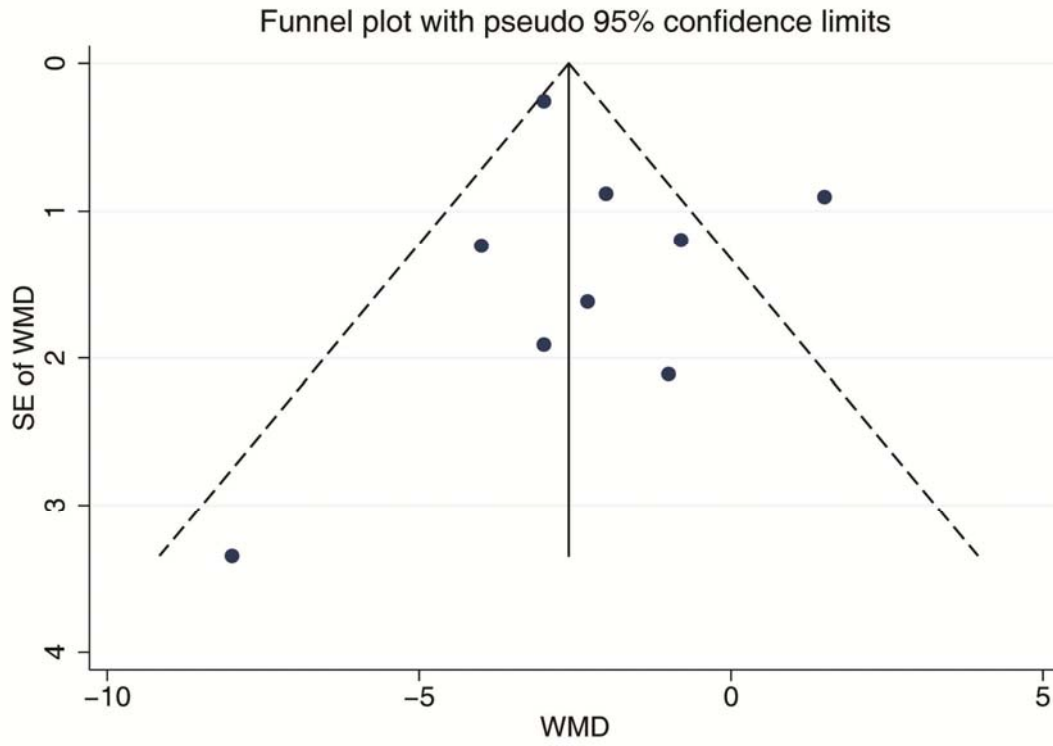

Figure S6 the funnel plots for the associations between VTE and HDL-C

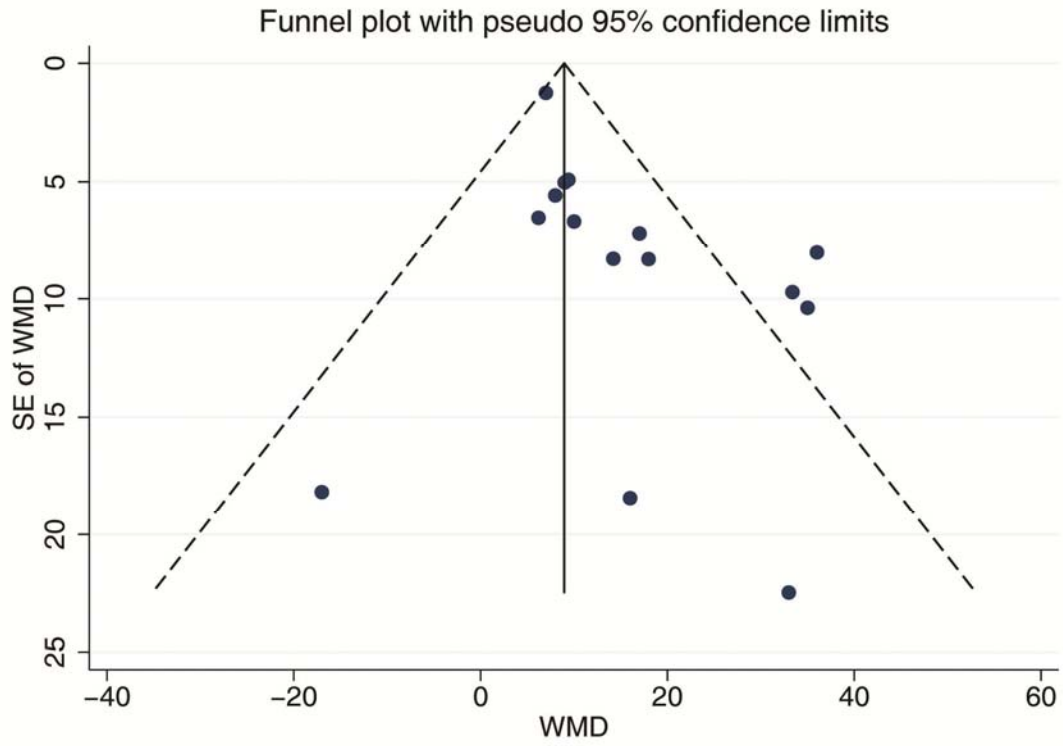

Figure S7 the funnel plots for the associations between VTE and TG
